# Supplementary material for: Mixed Modeling of Meta-Analysis P-Values (MixMAP) Suggests Multiple Novel Gene Loci for Low Density Lipoprotein Cholesterol
Source: PubMed Central journal article supplement (PMC3566142; doi:10.1371/journal.pone.0054812), 2013-02-06
Supplement: pone.0054812.s004.pdf [file pone.0054812.s004.pdf]

| <b>Ch #</b> | <b>Gene Name</b> | <b>EB Estimate</b> | <b>Prediction Variance</b> | <b>PI Upper Limit<sup>1</sup></b> | <b># of SNPs</b> |
|-------------|------------------|--------------------|----------------------------|-----------------------------------|------------------|
| 1           | CELSR2           | -1.083             | 0.029                      | -0.375                            | 23               |
| 2           | IL1R2            | -0.68              | 0.02                       | -0.093                            | 37               |
| 4           | FGF2             | -0.88              | 0.027                      | -0.194                            | 25               |
| 4           | TNIP3            | -0.95              | 0.041                      | -0.112                            | 14               |
| 6           | LPA              | -0.672             | 0.025                      | -0.015                            | 28               |
| 7           | GRM3             | -1.297             | 0.023                      | -0.674                            | 32               |
| 8           | VPS13B           | -0.653             | 0.024                      | -0.014                            | 30               |
