# Supplementary material for: Mixed Modeling of Meta-Analysis P-Values (MixMAP) Suggests Multiple Novel Gene Loci for Low Density Lipoprotein Cholesterol
Source: PLoS One. 2013 Feb 6;8(2):e54812. doi: 10.1371/journal.pone.0054812 (PMC3566142; doi:10.1371/journal.pone.0054812)
Supplement: Table S1 — Empirical Bayes (EB) estimates and corresponding prediction intervals for MixMAP supported genes in GLGC. The Empirical Bayes estimate and corresponding prediction variance for each gene are used in the construction of an associated one-sided prediction interval. 1The upper limit of this interval is reported using a Bonferroni corrected α = 0.05/(2960). An upper limit that is less than 0 implies the gene's random effect (on the inverse normal transformed ranked p-values) is significantly less than 0. Since negative transformed p-values that are large in absolute value correspond to small p-values on the original scale, this implies the gene as a whole has a significant effect on LDL-C. *Highlighted rows correspond to novel loci not identified using single SNP analysis. (PDF) [file pone.0054812.s003.pdf]

| Ch # | Gene Name | EB Estimate | Prediction Variance | PI Upper Limit <sup>1</sup> | # of SNPs |
|------|-----------|-------------|---------------------|-----------------------------|-----------|
| 1    | PCSK9     | -1.506      | 0.022               | -0.896                      | 34        |
| *1   | PKN2      | -0.88       | 0.033               | -0.127                      | 21        |
| 1    | CELSR2    | -2.399      | 0.031               | -1.674                      | 23        |
| 1    | PSRC1     | -1.557      | 0.077               | -0.41                       | 7         |
| 1    | MYBPHL    | -1.769      | 0.06                | -0.756                      | 10        |
| 1    | SORT1     | -1.981      | 0.026               | -1.317                      | 28        |
| 2    | APOB      | -1.969      | 0.015               | -1.454                      | 49        |
| *2   | FN1       | -0.674      | 0.017               | -0.132                      | 44        |
| *2   | UGT1A1    | -0.912      | 0.034               | -0.143                      | 20        |
| 2    | ABCG8     | -1.207      | 0.033               | -0.454                      | 21        |
| 2    | ABCG5     | -1.191      | 0.028               | -0.493                      | 25        |
| 2    | LCT       | -1.169      | 0.056               | -0.192                      | 11        |
| 3    | PPARG     | -0.801      | 0.015               | -0.285                      | 49        |
| 5    | HMGCR     | -1.451      | 0.056               | -0.474                      | 11        |
| 5    | COL4A3BP  | -1.54       | 0.064               | -0.488                      | 9         |
| *5   | DMGDH     | -0.903      | 0.036               | -0.117                      | 19        |
| 5    | SGCD      | -0.663      | 0.012               | -0.215                      | 66        |
| 5    | HAVCR2    | -1.006      | 0.056               | -0.029                      | 11        |
| 6    | HLA-DRA   | -0.95       | 0.049               | -0.033                      | 13        |
| 6    | MICA      | -1.159      | 0.034               | -0.39                       | 20        |
| 6    | LTA       | -0.855      | 0.038               | -0.051                      | 18        |
| 6    | C2        | -1.045      | 0.046               | -0.154                      | 14        |
| 6    | TAP2      | -0.762      | 0.028               | -0.063                      | 25        |
| *6   | PPARD     | -0.609      | 0.017               | -0.073                      | 45        |
| 6    | LPAL2     | -1.091      | 0.064               | -0.039                      | 9         |
| 6    | LPA       | -1.212      | 0.025               | -0.558                      | 29        |
| 7    | NPC1L1    | -1.311      | 0.046               | -0.421                      | 14        |
| *7   | CDK6      | -0.779      | 0.017               | -0.231                      | 43        |
| *8   | VPS13B    | -0.757      | 0.024               | -0.112                      | 30        |
| 8    | TRIB1     | -1.672      | 0.015               | -1.157                      | 49        |
| 9    | ABO       | -1.739      | 0.044               | -0.873                      | 15        |
| 9    | ABCA1     | -0.532      | 0.007               | -0.197                      | 121       |
| *10  | GAD2      | -0.94       | 0.032               | -0.201                      | 22        |
| 11   | FADS1     | -1.836      | 0.064               | -0.784                      | 9         |
| *11  | GAB2      | -1.101      | 0.049               | -0.184                      | 13        |
| 11   | BUD13     | -1.366      | 0.041               | -0.522                      | 16        |
| 11   | ZNF259    | -1.423      | 0.064               | -0.371                      | 9         |
| 11   | APOA5     | -1.359      | 0.084               | -0.154                      | 6         |
| 12   | ALDH2     | -1.187      | 0.077               | -0.04                       | 7         |
| 12   | TCF1      | -1.134      | 0.049               | -0.217                      | 13        |
| 16   | CETP      | -1.339      | 0.017               | -0.798                      | 44        |
| *17  | APOH      | -0.77       | 0.028               | -0.071                      | 25        |

*Continued on next page*

**Table 1 – continued from previous page – Lipids GWAS Meta-analysis data**

| <b>Ch #</b> | <b>Gene Name</b> | <b>EB Estimate</b> | <b>Prediction Variance</b> | <b>PI Upper Limit<sup>1</sup></b> | <b># of SNPs</b> |
|-------------|------------------|--------------------|----------------------------|-----------------------------------|------------------|
| *18         | NPC1             | -0.917             | 0.041                      | -0.073                            | 16               |
| 19          | LDLR             | -2.021             | 0.026                      | -1.356                            | 28               |
| 19          | NCAN             | -0.985             | 0.052                      | -0.039                            | 12               |
| 19          | BCL3             | -1.495             | 0.084                      | -0.29                             | 6                |
| 19          | PVRL2            | -1.811             | 0.041                      | -0.967                            | 16               |
| 19          | APOE             | -1.236             | 0.07                       | -0.139                            | 8                |
